# Supplementary material
Source: Elsevier journal article supplement (https://www.sciencedirect.com/science/article/pii/S0034935620302668)
Supplement: mmc1 [file S0034935620302668:mmc1.doc]

***Anexo 1. Estrategia de búsqueda en Pubmed***

# 1. Search **supraclavicular block[tiab]. 176**

# 2. Search **"axillary block"[Tiab]. 389**

# 3. Search **"infraclavicular block"[Tiab]. 162**

# 4. Search **"Anesthesia, Conduction"[Majr]. 46940**

# 5. Search **"Brachial Plexus Block"[Majr]. 324**

# 6. Search **"Brachial Plexus Block"[Tiab]. 1618**

# 7. Search **(((((regional anesthesia) OR "Brachial Plexus Block"[Majr]) OR "Brachial Plexus Block"[Tiab]) OR supraclavicular block[tiab]) OR "axillary block"[Tiab]) OR "infraclavicular block"[Tiab]. 72889**

# 8. Search **"hand surgery"[Tiab]. 2976**

# 9. Search **"forearm surgery"[Tiab]. 99**

# 10. Search **"elbow surgery"[Tiab]. 290**

# 11. Search **(("hand surgery"[Tiab]) OR "forearm surgery"[Tiab]) OR "elbow surgery"[Tiab]. 3342.**

# 12. Search **"Anesthesia"[Tiab]. 158127**

# 13. Search **"pain"[Tiab]. 565809**

# 14. Search **"anesthesia complication"[Tiab]. 40**

# 15. Search **"Trauma, Nervous System"[Mesh]** 85491

# 16. Search **"Pneumothorax"[Majr]. 11537**

# 17. Search **"Vascular System Injuries"[Majr]. 2131**

# 18. Search **(((("Vascular System Injuries"[Majr]) OR "Pneumothorax"[Majr]) OR "anesthesia complication"[Tiab]) OR "pain"[Tiab]) OR "Anesthesia"[Tiab] OR "Trauma, Nervous System"[Mesh]. 719187**

# 19. Search **((((((("Vascular System Injuries"[Majr]) OR "Pneumothorax"[Majr]) OR "anesthesia complication"[Tiab]) OR "pain"[Tiab]) OR "Anesthesia"[Tiab])) AND ((("hand surgery"[Tiab]) OR "forearm surgery"[Tiab]) OR "elbow surgery"[Tiab])) AND ((((((regional anesthesia) OR "Brachial Plexus Block"[Majr]) OR "Brachial Plexus Block"[Tiab]) OR supraclavicular block[tiab]) OR "axillary block"[Tiab]) OR "infraclavicular block"[Tiab])** Filters: **Adult: 19+ years. 191**
