# Supplementary material
Source: Elsevier journal article supplement (https://www.sciencedirect.com/science/article/pii/S0034935620302668)
Supplement: mmc2 [file S0034935620302668:mmc2.doc]

***Anexo 3. Gráfica de embudo para éxito anestésico***
