# Supplementary material
Source: Elsevier journal article supplement (https://www.sciencedirect.com/science/article/pii/S0034935620302668)
Supplement: mmc4 [file S0034935620302668:mmc4.doc]

***Anexo 5. Comparación bloqueo supraclavicular vs axilar vs infraclavicular. Desenlace: Tiempo de latencia anestésica.***

*Bloqueo Infraclavicular vs Supraclavicular*

*Bloqueo Axilar vs Infraclavicular*

*Bloqueo Axilar vs Supraclavicular*
