# Supplementary material
Source: Elsevier journal article supplement (https://www.sciencedirect.com/science/article/pii/S0034935620302668)
Supplement: mmc6 [file S0034935620302668:mmc6.pdf]

**Autor(es):** Fabián Casas-Arroyave; Estefania Ramirez-Mendoza; Andres Ocampo-Agudelo  
**Pregunta:** Bloqueo Axilar comparado con Bloqueo Infraclavicular para Anestesia del miembro superior  
**Configuración:**  
**Bibliografía:**

| Certainty assessment                                       |                    |                          |                    |                     |                    |                                                             | Nº de pacientes |                         | Efecto                |                                                     | Certainty     | Importancia |
|------------------------------------------------------------|--------------------|--------------------------|--------------------|---------------------|--------------------|-------------------------------------------------------------|-----------------|-------------------------|-----------------------|-----------------------------------------------------|---------------|-------------|
| Nº de estudios                                             | Diseño de estudio  | Riesgo de sesgo          | Inconsistencia     | Evidencia indirecta | Imprecisión        | Otras consideraciones                                       | Bloqueo Axilar  | Bloqueo Infraclavicular | Relativo (95% CI)     | Absoluto (95% CI)                                   |               |             |
| Complicaciones Anestésicas                                 |                    |                          |                    |                     |                    |                                                             |                 |                         |                       |                                                     |               |             |
| 11                                                         | ensayos aleatorios | no es serio              | serio <sup>a</sup> | no es serio         | no es serio        | ninguno                                                     | 42/431 (9.7%)   | 34/420 (8.1%)           | RR 1.20 (0.78 a 1.85) | 16 más por 1000 (de 18 menos a 69 más )             | ⊕⊕⊕⊖ MODERADO | CRÍTICO     |
| Exito anestésico                                           |                    |                          |                    |                     |                    |                                                             |                 |                         |                       |                                                     |               |             |
| 11                                                         | ensayos aleatorios | no es serio              | no es serio        | no es serio         | no es serio        | ninguno                                                     | 372/431 (86.3%) | 387/420 (92.1%)         | RR 0.94 (0.89 a 0.98) | 55 menos por 1000 (de 101 menos a 18 menos )        | ⊕⊕⊕⊕ ALTA     | CRÍTICO     |
| Tiempo de realización del bloqueo (evaluado con : minutos) |                    |                          |                    |                     |                    |                                                             |                 |                         |                       |                                                     |               |             |
| 8                                                          | ensayos aleatorios | muy serio <sup>b</sup>   | serio <sup>c</sup> | no es serio         | no es serio        | se sospechaba fuertemente sesgo de publicación <sup>d</sup> | 351             | 340                     | -                     | MD 1.08 min más alto. (0.27 menor a 2.43 más alto.) | ⊕⊖⊖⊖ MUY BAJA | IMPORTANTE  |
| Tiempo de latencia anestésica (evaluado con : minutos)     |                    |                          |                    |                     |                    |                                                             |                 |                         |                       |                                                     |               |             |
| 5                                                          | ensayos aleatorios | no es serio <sup>b</sup> | serio <sup>c</sup> | no es serio         | serio <sup>e</sup> | se sospechaba fuertemente sesgo de publicación <sup>d</sup> | 190             | 190                     | -                     | MD 0.33 min menor (2.35 menor a 1.69 más alto.)     | ⊕⊖⊖⊖ MUY BAJA | IMPORTANTE  |

**CI:** Intervalo de confianza ; **RR:** Razón de riesgo; **MD:** Diferencia media

**Explicaciones**

- a. En varios de los estudios incluidos existe un riesgo a favor de una intervención y en otros un riesgo a favor de la otra intervención lo que lleva a una posible inconsistencia entre los estudios.
- b. Alto riesgo de heterogeneidad entre los estudios.
- c. Existen resultados a favor y en contra altamente diferencial entre los diferentes estudios.
- d. Debido a que este es un desenlace secundario en casi todos los estudios, no es reportado en gran parte de los estudios incluidos en esta revisión.
- e. Existe alta divergencia en los intervalos de tiempo entre las diferentes intervenciones en los estudios incluidos.
